# Supplementary material
Source: Springer Nature journal article supplement (https://www.springermedizin.de/resource/supplementary/12930_2013_62_MOESM1_ESM.pdf/9424668)
Supplement: MOESM1 [file 9424668]

### **First stage: Preliminary semi-structured interviews**

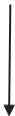

- Carried out four interviews.
- Consolidated basic data for workshop.
- Used qualitative content analysis [24] as the analytical technique.

### **Second stage: Workshop**

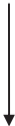

- Discussed deeply the contents raised in the first stage.
- For reference, used the preliminary results of the first stage at the beginning.
- Used KJ method [25] as the analytical technique.

### **Completion of the research**
